# Supplementary material for: A recoverable polyoxometalate-ionic liquid catalyst for selective cleavage of lignin β-O-4 models under mild conditions
Source: Royal Society of Chemistry journal article supplement (doi:10.1039/d3gc00087g), 2023-01-01
Supplement: d3gc00087g1.pdf [file d3gc00087g1.pdf]

# Electronic Supplementary Information

## Recoverable Polyoxometalate-Ionic Liquids Catalyst for Selective Cleavage of Lignin $\beta$ -O-4 Models Under Mild Conditions

Xing Xin, Zheng Li, Manzhou Chi, Mo Zhang, Yuanyuan Dong, Hongjin Lv\* and Guo-Yu Yang\*

MOE Key Laboratory of Cluster Science, Beijing Key Laboratory of Photoelectric/  
Electrophotonic Conversion Materials, School of Chemistry and Chemical Engineering, Beijing  
Institute of Technology, Beijing 102488, China

\*Corresponding author ([hlv@bit.edu.cn](mailto:hlv@bit.edu.cn); [ygy@bit.edu.cn](mailto:ygy@bit.edu.cn))

## Table of Contents

|                   |                                                                                                                |     |
|-------------------|----------------------------------------------------------------------------------------------------------------|-----|
| <b>Figure S1</b>  | FT-IR spectrum of HPMoV.                                                                                       | S3  |
| <b>Table S1</b>   | The catalytic results of PP-one oxidation under different conditions.                                          | S3  |
| <b>Figure S2</b>  | Digital photo of the post-reaction solution catalyzed by HPMoV before (left) and after (right) addition of EA. | S4  |
| <b>Figure S3</b>  | The yields of aromatic products and mass loss curve of catalyst in five cycles.                                | S4  |
| <b>Figure S4</b>  | FT-IR spectra of HPMoV, BMIM-SO <sub>3</sub> and recovered HPMoV-BMIM-SO <sub>3</sub> H ILs catalysts.         | S4  |
| <b>Table S2</b>   | Comparing of the activities of different catalysts in the oxidation of PP-ol or PP-one.                        | S5  |
| <b>Figure S5</b>  | Digital photo and GC-MS pattern of the post-reaction pine wood extractives                                     | S6  |
| <b>Figure S6</b>  | GC-MS pattern of (2-phenoxyvinyl)benzene.                                                                      | S6  |
| <b>Figure S7</b>  | Photographs of poly(4'-hydroxyacetophenone) and poly(4'-hydroxyacetophenol).                                   | S6  |
| <b>Figure S8</b>  | <sup>1</sup> H-NMR spectrum of PP-one.                                                                         | S7  |
| <b>Figure S9</b>  | <sup>1</sup> H-NMR spectrum of PP-ol.                                                                          | S7  |
| <b>Figure S10</b> | <sup>1</sup> H-NMR spectrum of 1-(4-methoxyphenyl)-2-phenoxyethanone.                                          | S8  |
| <b>Figure S11</b> | <sup>1</sup> H-NMR spectrum of 1-(4-methoxyphenyl)-2-phenoxyethanol.                                           | S8  |
| <b>Figure S12</b> | <sup>1</sup> H-NMR spectrum of 2-(2-methoxyphenoxy)-1-phenylethanone.                                          | S9  |
| <b>Figure S13</b> | <sup>1</sup> H-NMR spectrum of 2-(2-methoxyphenoxy)-1-phenylethanol.                                           | S9  |
| <b>Figure S14</b> | <sup>1</sup> H-NMR spectrum of 1-phenyl-2-(p-tolyloxy)ethanone.                                                | S10 |
| <b>Figure S15</b> | <sup>1</sup> H-NMR spectrum of 1-phenyl-2-(p-tolyloxy)ethanol.                                                 | S10 |
| <b>Figure S16</b> | <sup>1</sup> H-NMR spectrum of 2-(2-methoxyphenoxy)-1-(4-methoxyphenyl)ethanone.                               | S11 |
| <b>Figure S17</b> | <sup>1</sup> H-NMR spectrum of 2-(2-methoxyphenoxy)-1-(4-methoxyphenyl)ethanol.                                | S11 |
| <b>Figure S18</b> | <sup>1</sup> H-NMR spectrum of 1-(3,4-dimethoxyphenyl)-3-(2-methoxyphenyl)propan-1-one.                        | S12 |
| <b>Figure S19</b> | <sup>1</sup> H-NMR spectrum of 1-(3,4-dimethoxyphenyl)-3-(2-methoxyphenyl)propan-1-ol.                         | S12 |

## Lists of the purchased organic chemicals with CAS numbers

|                                                                                                |                    |                       |                  |
|------------------------------------------------------------------------------------------------|--------------------|-----------------------|------------------|
| 1-methyl-3-(4-sulfobutyl)-1H-imidazolium inner salt (BMIM-SO <sub>3</sub> , CAS#: 179863-07-1) |                    |                       |                  |
| 1-phenyl-1,2-ethanediol                                                                        | (CAS#: 93-56-1)    | 2-hydroxyacetophenone | (CAS#: 582-24-1) |
| phenethoxybenzene                                                                              | (CAS#: 40515-89-7) | 4-methoxybenzoic acid | (CAS#: 100-09-4) |
| 3,4-dimethoxybenzoic acid                                                                      | (CAS#: 93-07-2)    | 4-hydroxybenzoic acid | (CAS#: 99-96-7)  |
| 2-methoxyphenol                                                                                | (CAS#: 90-05-1)    | p-methylphenol        | (CAS#: 106-44-5) |
| 2-bromoacetophenone                                                                            | (CAS#: 70-11-1)    | $\beta$ -bromostyrene | (CAS#: 103-64-0) |
| 2-bromo-1-(3,4-dimethoxyphenyl)ethanone                                                        |                    | (CAS#: 1835-02-5)     |                  |
| 2-bromo-4'-hydroxyacetophenone                                                                 |                    | (CAS#: 2491-38-5)     |                  |
| 2-bromo-1-(4-methoxyphenyl)ethanone                                                            |                    | (CAS#: 2632-13-5)     |                  |
| ethyl 2-oxocyclohexanecarboxylate                                                              |                    | (CAS#: 1655-07-8)     |                  |

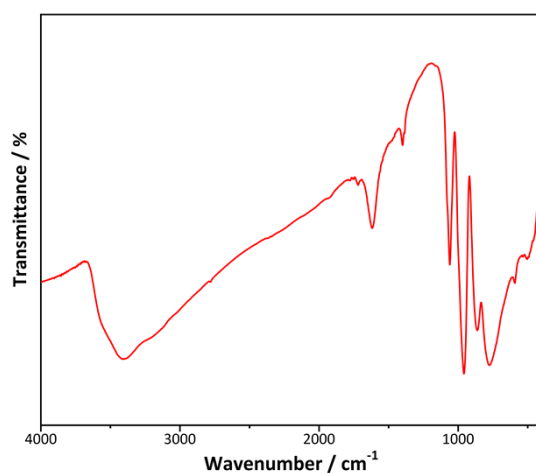

**Figure S1** FT-IR spectrum of HPMoV.

**Table S1** The catalytic results of PP-one oxidation under different conditions.

| Entry | Substrates | Additions                                                              | Con. (%) | BA Yield (%) | Ph-OH Yield (%) | Aromatic products Yield (%) |
|-------|------------|------------------------------------------------------------------------|----------|--------------|-----------------|-----------------------------|
| 1     | PP-one     | O <sub>2</sub> , HPMoV, BMIM-SO <sub>3</sub>                           | 95       | 85           | 75              | 80                          |
| 2     | PP-one     | N <sub>2</sub> , HPMoV, BMIM-SO <sub>3</sub>                           | 38       | 7            | 33              | 20                          |
| 3     | PP-one     | O <sub>2</sub> , HPMoV                                                 | 87       | 84           | 72              | 78                          |
| 4     | PP-one     | O <sub>2</sub> , BMIM-SO <sub>3</sub>                                  | 57       | 37           | 48              | 43                          |
| 5     | PP-one     | O <sub>2</sub> , H <sub>2</sub> SO <sub>4</sub> , BMIM-SO <sub>3</sub> | 79       | 59           | 59              | 59                          |
| 6     | PP-one     | O <sub>2</sub> , HPMoV, BMIM-SO <sub>3</sub> , LiOH                    | 88       | 60           | 66              | 63                          |

Conditions: PP-one (0.3 mmol), HPMoV (0.03 mmol), BMIM-SO<sub>3</sub> (0.15 mmol), H<sub>2</sub>SO<sub>4</sub> (0.075 mmol), LiOH (0.15 mmol), DMSO (1 mL), 130 °C, 6 h, 1 atm gas pressure.

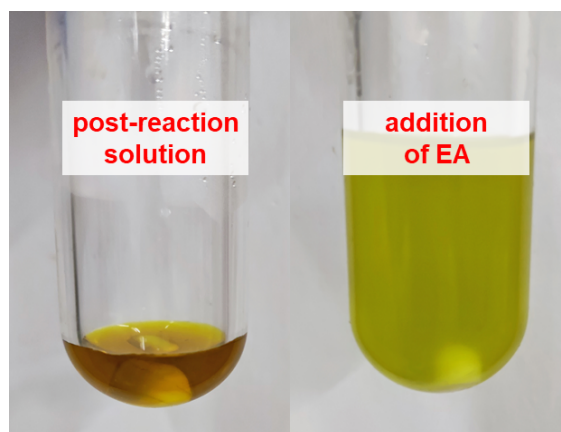

**Figure S2** Digital photo of the post-reaction solution catalyzed by HPMoV before (left) and after (right) addition of EA.

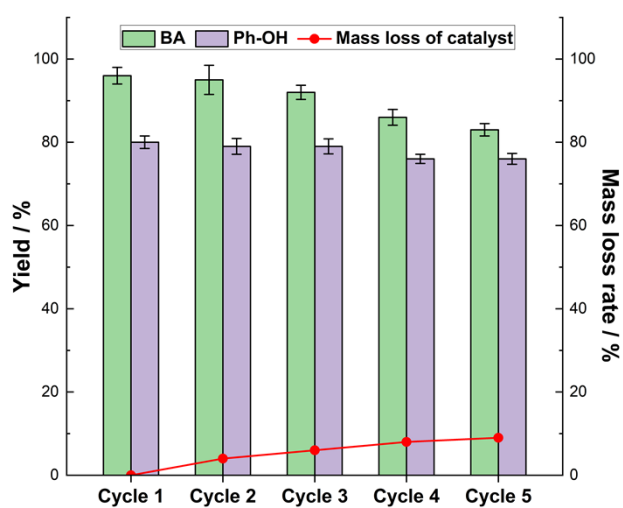

**Figure S3** The yields of aromatic products and mass loss curve of catalyst in five cycles.

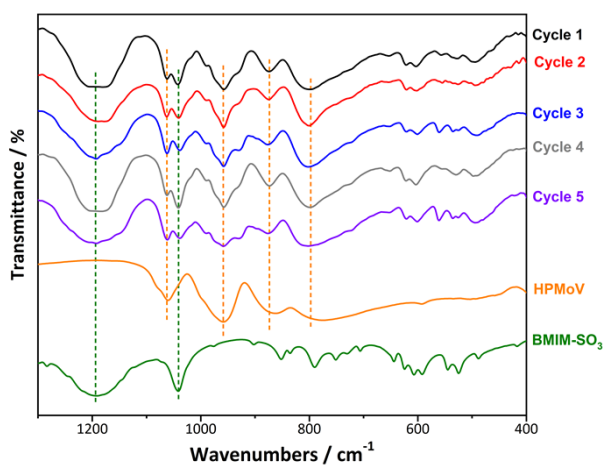

**Figure S4** FT-IR spectra of HPMoV, BMIM-SO<sub>3</sub>, and recovered HPMoV-BMIM-SO<sub>3</sub>H ILs catalysts.

**Table S2** Comparing of the activities of different catalysts in the oxidation of PP-ol or PP-one.

| Substrates | Catalyst                                                                               | Solvent                            | Conditions                          | Products (Yield %)                                       | Recyclability | Ref.      |
|------------|----------------------------------------------------------------------------------------|------------------------------------|-------------------------------------|----------------------------------------------------------|---------------|-----------|
| PP-ol      | VO(acac) <sub>2</sub>                                                                  | C <sub>3</sub> H <sub>6</sub> COOH | 1 bar O <sub>2</sub> , 80 °C, 8 h   | Ph-OH (49), BA (26)                                      | No            | S1        |
| PP-ol      | Pd/CeO <sub>2</sub>                                                                    | methanol                           | 1 bar O <sub>2</sub> , 185 °C, 24 h | Ph-OH (48), acetophenone (38)                            | Yes           | S2        |
| PP-ol      | VOSO <sub>4</sub> , TEMPO                                                              | CH <sub>3</sub> CN                 | 4 bar O <sub>2</sub> , 100 °C, 12 h | PP-one (82)                                              | No            | S3        |
| PP-one     | Cu(OAc) <sub>2</sub> , phen                                                            | methanol                           | 4 bar O <sub>2</sub> , 80 °C, 2 h   | Ph-OH (85), BA (95)                                      | No            | S3        |
| PP-ol      | Cu(OAc) <sub>2</sub> , phen                                                            | DMSO                               | 4 bar O <sub>2</sub> , 80 °C, 6 h   | BA (79)                                                  | No            | S4        |
| PP-ol      | NaNO <sub>2</sub> , DDQ, NHPI                                                          | CH <sub>3</sub> CN                 | 4 bar O <sub>2</sub> , 80 °C, 2 h   | PP-one (95)                                              | No            | S5        |
| PP-one     | [OMIm][OAc]                                                                            | H <sub>2</sub> O                   | 14 bar O <sub>2</sub> , 100 °C, 2 h | Ph-OH (96), BA (86)                                      | No            | S6        |
| PP-one     | Cu(OAc) <sub>2</sub> , BF <sub>3</sub> ·OEt <sub>2</sub>                               | methanol                           | 4 bar O <sub>2</sub> , 100 °C, 6 h  | Ph-OH (95)                                               | No            | S7        |
| PP-one     | CTFs                                                                                   | methanol                           | 5 bar O <sub>2</sub> , 160 °C, 6 h  | Ph-OH (45), BA (24)                                      | Yes           | S8        |
| PP-ol      | VB <sub>12</sub> @C, K <sub>2</sub> CO <sub>3</sub>                                    | methanol                           | 1 bar O <sub>2</sub> , 80 °C, 24 h  | Ph-OH (96), BA (73), MB (26)                             | Yes           | S9        |
| β-O-4-ol   | Pd(OAc) <sub>2</sub>                                                                   | DMSO                               | Air, 60 °C, 18 h                    | β-O-4-one (84 >)                                         | No            | S10       |
| PP-ol      | NENU-MV-5                                                                              | methanol                           | 4 bar O <sub>2</sub> , 100 °C, 12 h | Ph-OH (60), BA (10), MB (90)                             | Yes           | S11       |
| PP-ol      | [MIMPS] <sub>2</sub> H <sub>4</sub> P <sub>2</sub> Mo <sub>18</sub> O <sub>62</sub>    | ethanol                            | 5 bar O <sub>2</sub> , 140 °C, 10 h | Ph-OH (84), acetophenone (75)                            | Yes           | S12       |
| PP-ol      | BetH <sub>5</sub> V <sub>2</sub> Mo <sub>18</sub>                                      | ethanol                            | 8 bar O <sub>2</sub> , 140 °C, 8 h  | Ph-OH (86), acetophenone (77), BA (5), EB (1.8)          | Yes           | S13       |
| PP-one     | CTFs                                                                                   | methanol                           | 5 bar O <sub>2</sub> , 120 °C, 2 h  | Ph-OH (60), MB (10), BA (15), methyl benzoylformate (25) | Yes           | S14       |
| PP-ol      | CuCl <sub>2</sub> , phen, NIS,<br>K <sub>2</sub> CO <sub>3</sub> , methanol, 4 Å       | DMSO                               | 5 bar O <sub>2</sub> , 140 °C, 12 h | MB (87)                                                  | No            | S15       |
| PP-one     | CuCl, NaOH                                                                             | H <sub>2</sub> O                   | Air, 30 °C, 5.5 h                   | Ph-OH (89), BA (85)                                      | No            | S16       |
| PP-ol      | H <sub>5</sub> PMo <sub>10</sub> V <sub>2</sub> O <sub>40</sub> , BMIM-SO <sub>3</sub> | DMSO                               | 1 bar O <sub>2</sub> , 130 °C, 12 h | Ph-OH (80), BA (95)                                      | Yes           | This work |
| PP-one     | H <sub>5</sub> PMo <sub>10</sub> V <sub>2</sub> O <sub>40</sub> , BMIM-SO <sub>3</sub> | DMSO                               | 1 bar O <sub>2</sub> , 130 °C, 6 h  | Ph-OH (75), BA (85)                                      | Yes           | This work |

BA, benzoic acid. Ph-OH, phenol. MB, Methyl benzoate. EB, ethyl benzoate.

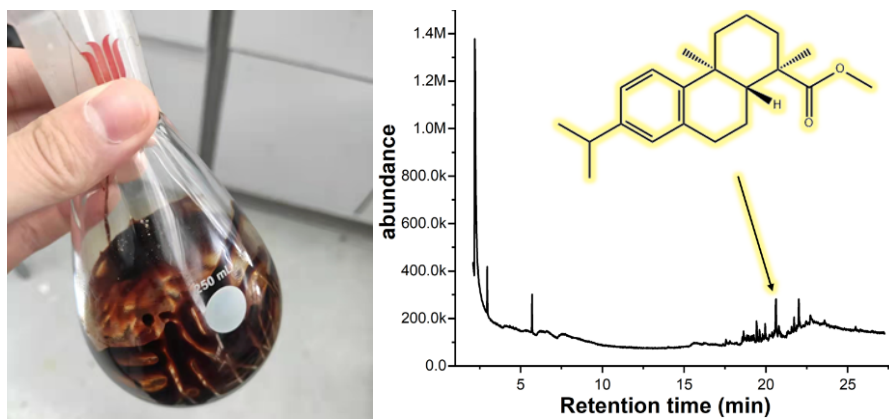

**Figure S5** Digital photo and GC signal of the post-reaction solution using pine wood extractives as substrate.

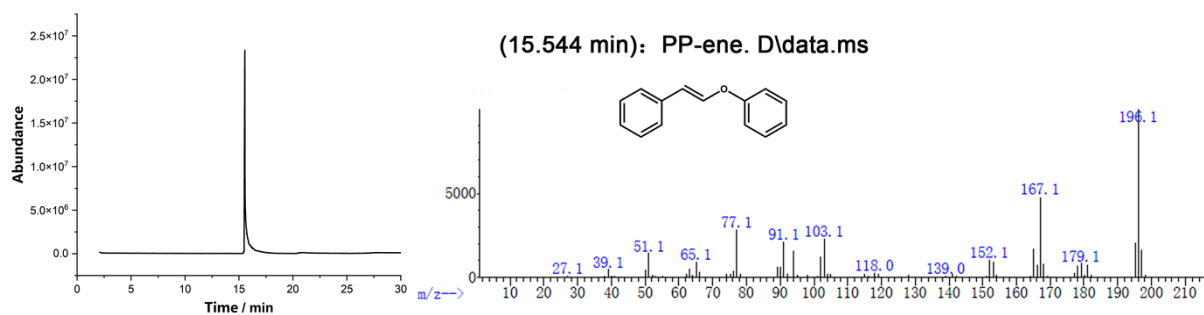

**Figure S6** GC-MS pattern of (2-phenoxyvinyl)benzene.

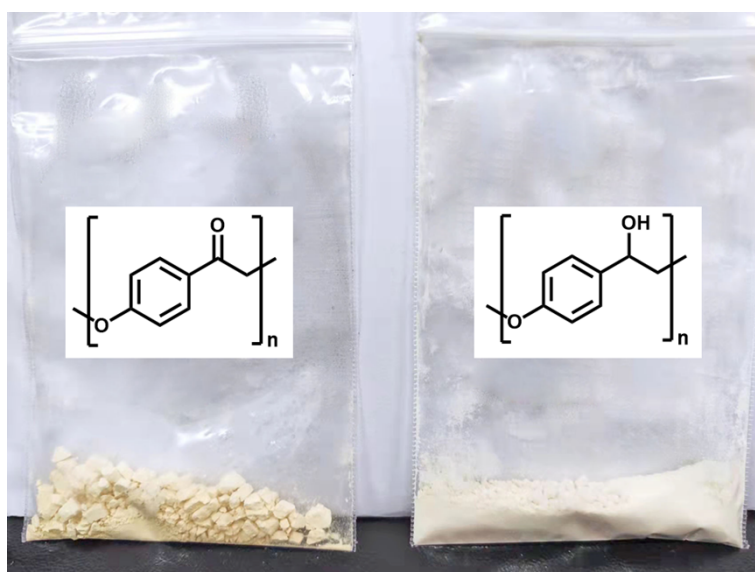

**Figure S7** Digital photo of poly(4'-hydroxyacetophenone) and poly(4'-hydroxyacetophenol).

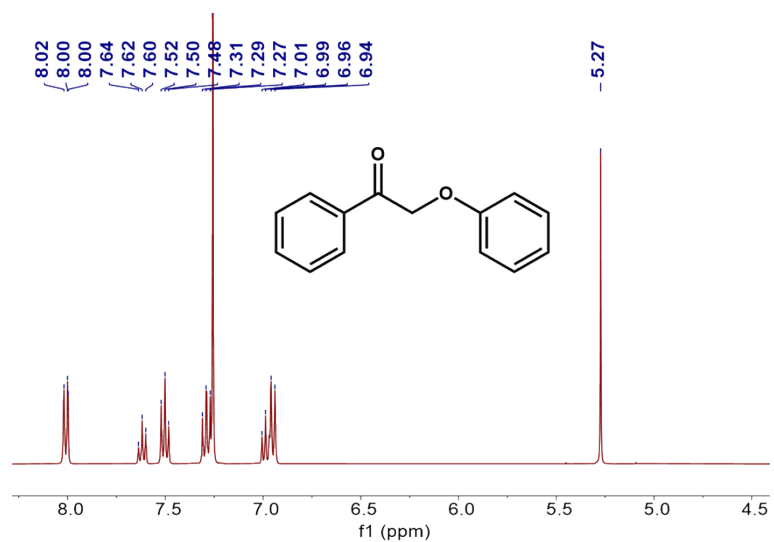

**Figure S8** <sup>1</sup>H-NMR spectrum of PP-one.

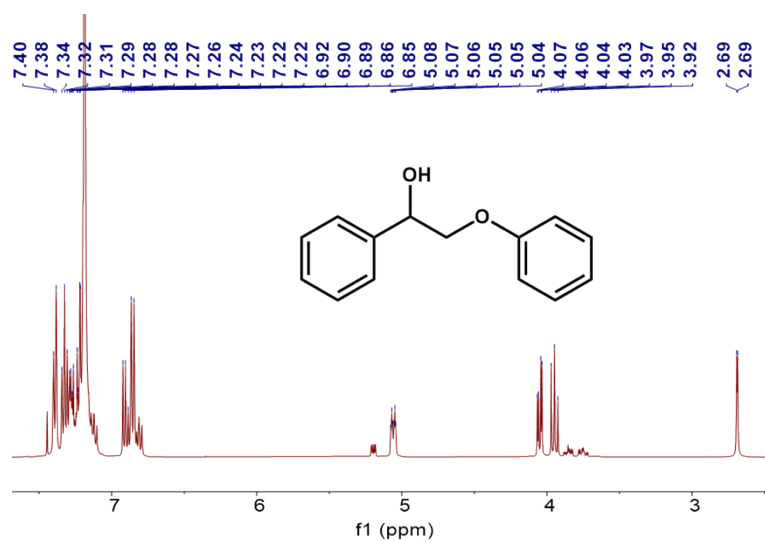

**Figure S9** <sup>1</sup>H-NMR spectrum of PP-ol.

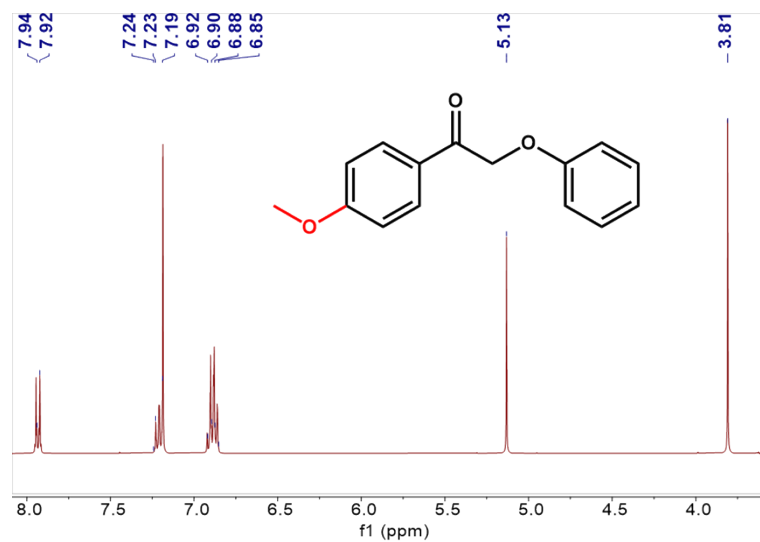

**Figure S10** <sup>1</sup>H-NMR spectrum of 1-(4-methoxyphenyl)-2-phenoxyethanone.

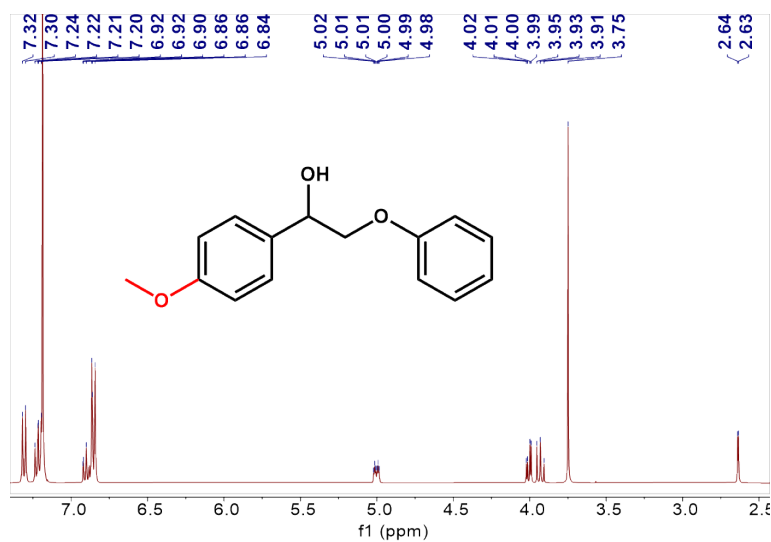

**Figure S11** <sup>1</sup>H-NMR spectrum of 1-(4-methoxyphenyl)-2-phenoxyethanol.



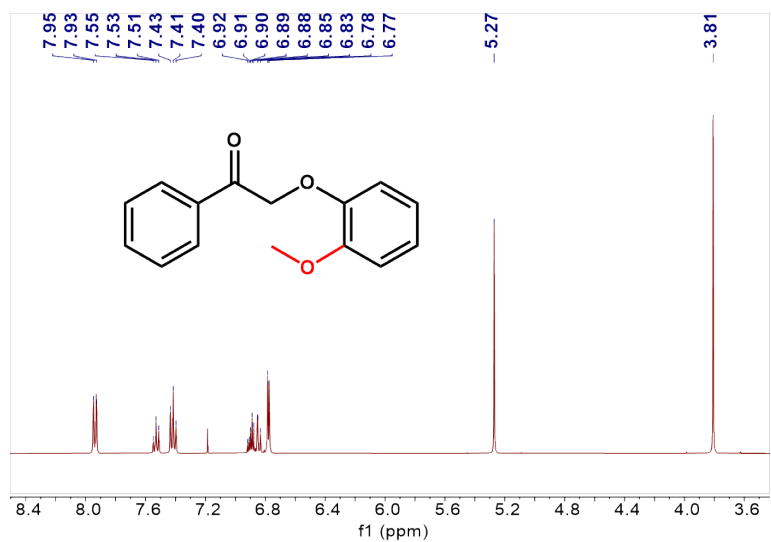

**Figure S12** <sup>1</sup>H-NMR spectrum of 2-(2-methoxyphenoxy)-1-phenylethanone.

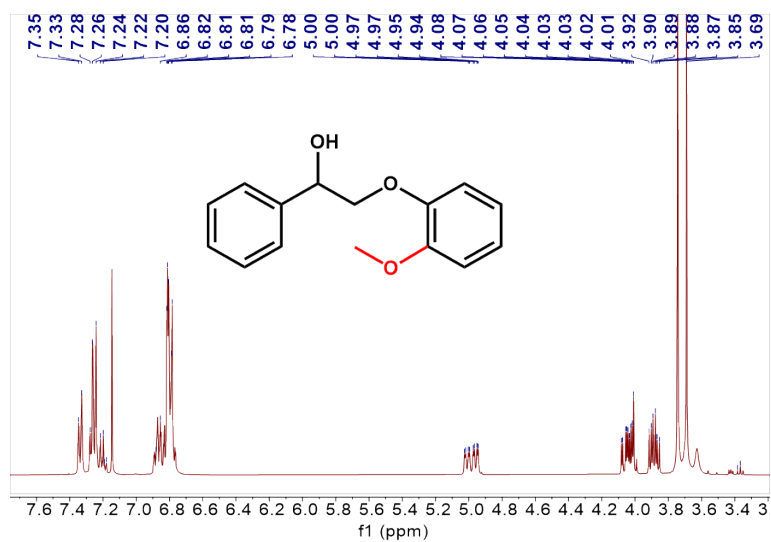

**Figure S13** <sup>1</sup>H-NMR spectrum of 2-(2-methoxyphenoxy)-1-phenylethanol.

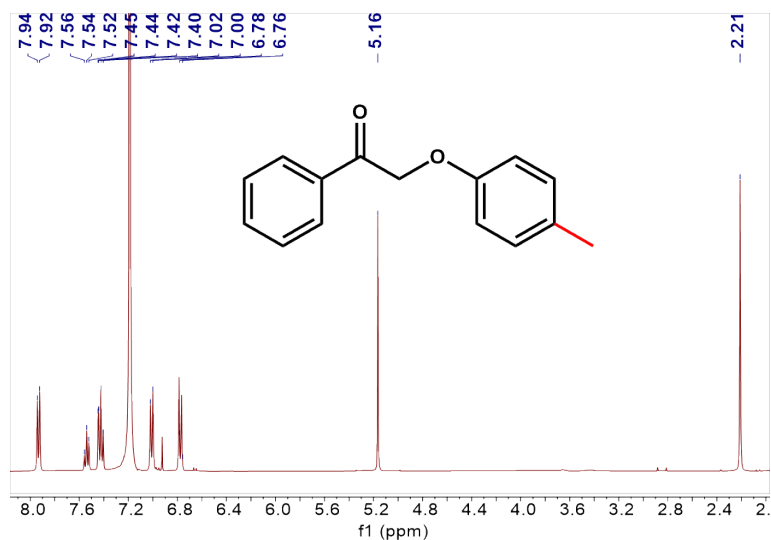

Figure S14  $^1\text{H-NMR}$  spectrum of 1-phenyl-2-(*p*-tolylloxy)ethanone.

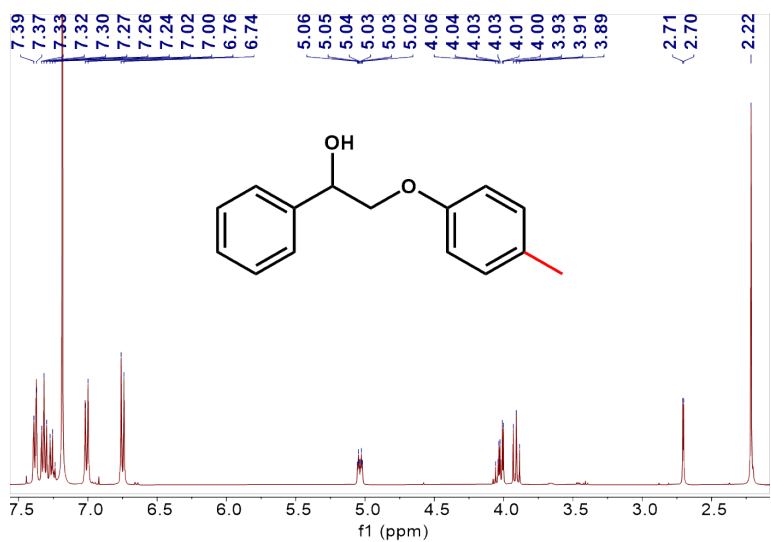

Figure S15  $^1\text{H-NMR}$  spectrum of 1-phenyl-2-(*p*-tolylloxy)ethanol.

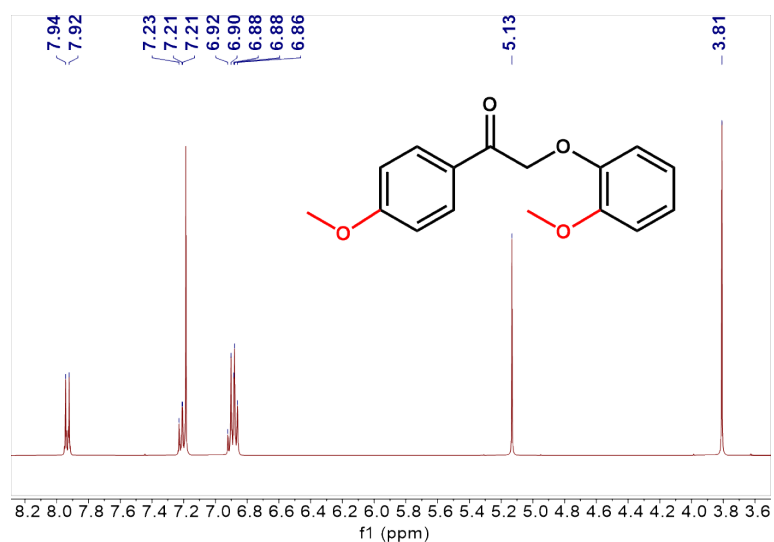

**Figure S16**  $^1\text{H-NMR}$  spectrum of 2-(2-methoxyphenoxy)-1-(4-methoxyphenyl)ethenone.

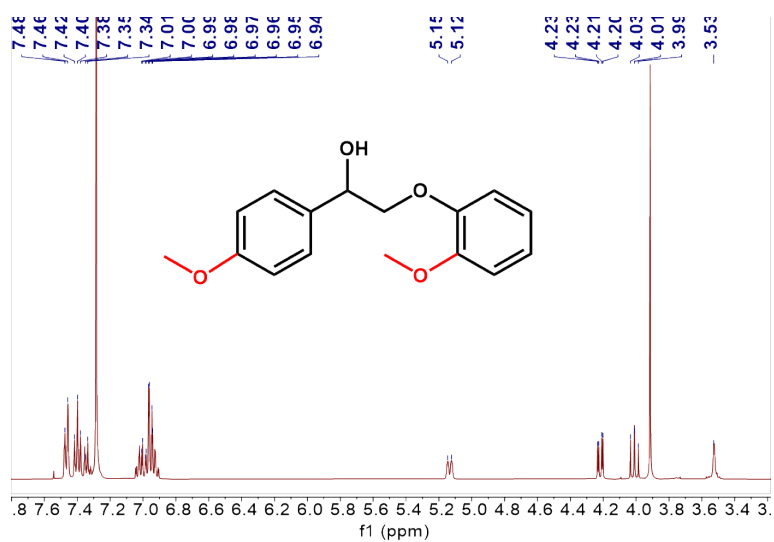

**Figure S17**  $^1\text{H-NMR}$  spectrum of 2-(2-methoxyphenoxy)-1-(4-methoxyphenyl)ethanol.

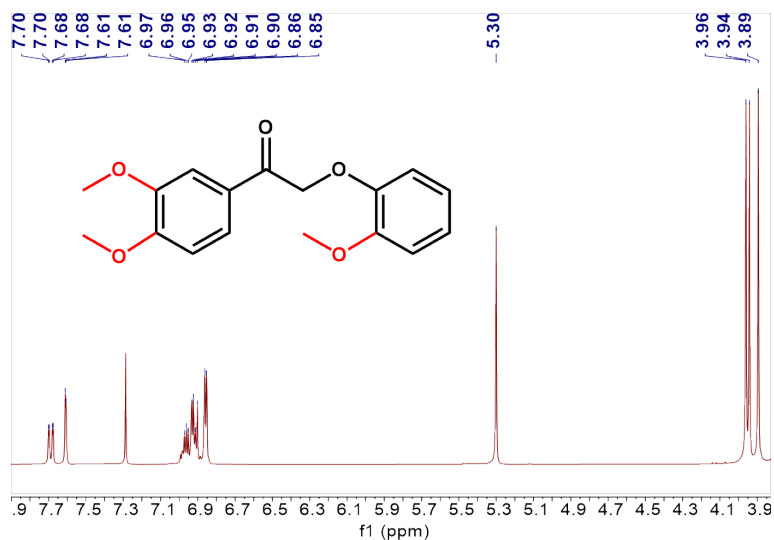

**Figure S18**  $^1\text{H-NMR}$  spectrum of 1-(3,4-dimethoxyphenyl)-3-(2-methoxyphenyl)propan-1-one.

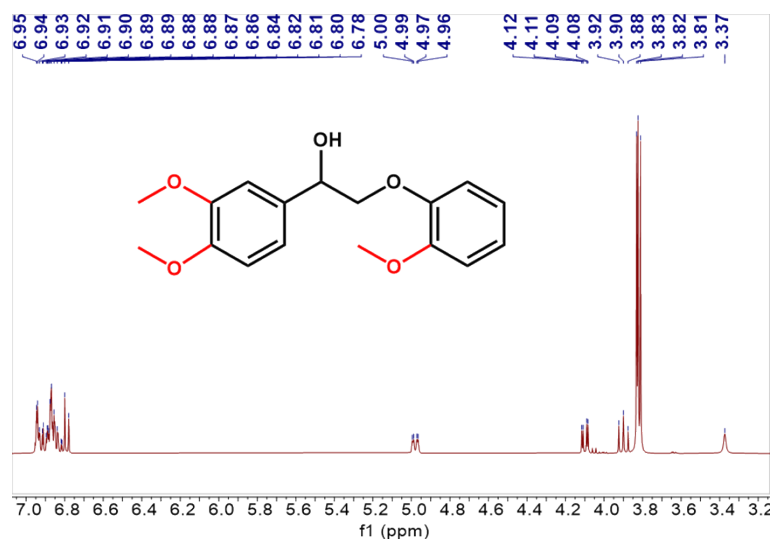

**Figure S19**  $^1\text{H-NMR}$  spectrum of 1-(3,4-dimethoxyphenyl)-3-(2-methoxyphenyl)propan-1-ol.

## Reference:

- S1. Y. Y. Ma, Z. T. Du, J. X. Liu, F. Xia and J. Xu, *Green Chem.*, 2015, **17**, 4968-4973.
- S2. W. Deng, H. Zhang, X. Wu, R. Li, Q. Zhang and Y. Wang, *Green Chem.*, 2015, **17**, 5009-5018.
- S3. M. Wang, J. Lu, X. Zhang, L. Li, H. Li, N. Luo and F. Wang, *ACS Catal.*, 2016, **6**, 6086-6090.
- S4. M. Wang, J. Lu, L. Li, H. Li, H. Liu and F. Wang, *J. Catal.*, 2017, **348**, 160-167.
- S5. C. Zhang, H. Li, J. Lu, X. Zhang, K. E. MacArthur, M. Heggen and F. Wang, *ACS Catal.*, 2017, **7**, 3419-3429.
- S6. Y. Yang, H. Fan, Q. Meng, Z. Zhang, G. Yang and B. Han, *Chem. Commun.*, 2017, **53**, 8850-8853.
- S7. M. Wang, L. H. Li, J. M. Lu, H. J. Li, X. C. Zhang, H. F. Liu, N. C. Luo and F. Wang, *Green Chem.*, 2017, **19**, 702-706.
- S8. L. Zhao, S. Shi, M. Liu, G. Zhu, M. Wang, W. Du, J. Gao and J. Xu, *Green Chem.*, 2018, **20**, 1270-1279.
- S9. H. Luo, L. Wang, G. Li, S. Shang, Y. Lv, J. Niu and S. Gao, *ACS Sustainable Chem. Eng.*, 2018, **6**, 14188-14196.
- S10. G. Magallanes, M. D. Kärkäs, I. Bosque, S. Lee, S. Maldonado and C. R. J. Stephenson, *ACS Catal.*, 2019, **9**, 2252-2260.
- S11. H.-R. Tian, Y.-W. Liu, Z. Zhang, S.-M. Liu, T.-Y. Dang, X.-H. Li, X.-W. Sun, Y. Lu and S.-X. Liu, *Green Chem.*, 2020, **22**, 248-255.
- S12. Y. Li, X. Zhang, Z. Li, J. Song and X. Wang, *ChemSusChem*, 2019, **12**, 4936-4945.
- S13. Z. Li, Y. Li, Y. Chen, Q. Wang, M. Jadoon, X. Yi, X. Duan and X. Wang, *ACS Catal.*, 2022, **12**, 9213-9225.
- S14. G. Zhu, S. Shi, L. Zhao, M. Liu, J. Gao and J. Xu, *ACS Catal.*, 2020, **10**, 7526-7534.
- S15. M. Liu, Z. Zhang, J. Yan, S. Liu, H. Liu, Z. Liu, W. Wang, Z. He and B. Han, *Chem*, 2020, **6**, 3288-3296.
- S16. Y. Hu, L. Yan, X. Zhao, C. Wang, S. Li, X. Zhang, L. Ma and Q. Zhang, *Green Chem.*, 2021, **23**, 7030-7040.
